# Supplementary material for: Synthesis of new terpyridine-like ligands based on triazolopyridines and benzotriazoles
Source: Royal Society of Chemistry journal article supplement (doi:10.1039/c7nj00962c), 2017-01-01

## Electronic Supplementary Information (ESI)

### Synthesis of New Terpyridine-like ligands based on Triazolopyridines and Benzotriazoles

M. Cabrero-Antonino<sup>a</sup>, R. Ballesteros-Garrido<sup>a,b\*</sup>, L. Chiassai<sup>a</sup>, E. Escrivà<sup>c</sup>, C. Ramirez de Arellano<sup>a,d</sup>, R. Ballesteros<sup>a</sup> and B. Abarca<sup>a</sup>.

S1: Materials and Methods

S2: NMR Spectra

S3: Fluorescence Spectra

S4 Ortep for **TPT** and Ru(**TPT**)<sub>2</sub>

S5: HRMS and NMR Spectra of Ru(**TPT**)<sub>2</sub>

*a) Universitat de Valencia, Facultat de Farmacia Dpto Química Organica, Vicente Andres Estellés s/n 46100 Burjassot, Spain*

*b) ICMol, Universitat de Valencia Catedrático José Beltrán Martínez nº 2 46980 Paterna, Spain*

*c) Universitat de Valencia, Facultat de Farmacia Dpto Química Inorganica, Vicente Andres Estellés s/n 46100 Burjassot, Spain*

*d) Centro de Innovación en Química Avanzada (ORFEO-CINQA), E-46100, Valencia, Spain*

## S1: Materials and Methods

Starting materials, if commercially available, were purchased and used as such. The solvents used were of spectroscopic or equivalent grade. When known compounds had to be prepared by literature procedures, pertinent references are given. Melting points or ranges (m.p.) given were determined on a Büchi B-545 heated stage.  $^1\text{H}$  and ( $^1\text{H}$  decoupled)  $^{13}\text{C}$  nuclear magnetic resonance (NMR) spectra were recorded at 300 and 75 MHz. Chemical shifts are reported in  $\delta$  units, parts per million (ppm), and were measured relative to the signals for residual deuterated water or deuterated methanol. Coupling constants (J) are given in Hz. Coupling patterns are abbreviated as, for example, s (singlet), d (doublet), t (triplet), q (quartet), td (triplet of doublets), m (multiplet), app. s (apparent singlet) and br. (broad). COSY and DEPT/ed-HSQC experiments were performed for all compounds. IR spectra were recorded using FT-IR ATR. HRMS were recorded using TOF electro-spray ionization (ESI-positive). UV-Visible spectra were measured on an Agilent 8453 spectrometer equipped with a Peltier temperature controller system ( $\pm 0.1$  °C). The emission spectra were recorded with a PTI MO- 5020 spectrofluorimeter in the 300–700 nm range. Quantum yield was determined with a Hamamatsu-PHA equipment. The absorbance of the excitation wavelength was maintained lower than 0.15.  $10^{-5}$  M solutions of ligands were prepared using 98/2 ethanol/water v/v as solvent.  $\text{M}^{2+}$  solutions were prepared solving the corresponding perchlorate in 98/2 ethanol/water v/v  $10^{-3}$  mol dm $^{-3}$  concentration. Working solutions were obtained mixing 2 mL of the solution of ligands with the corresponding amounts of the solutions of the metals.

## S2: NMR Spectra

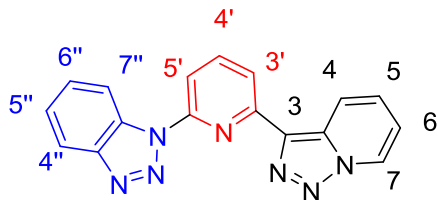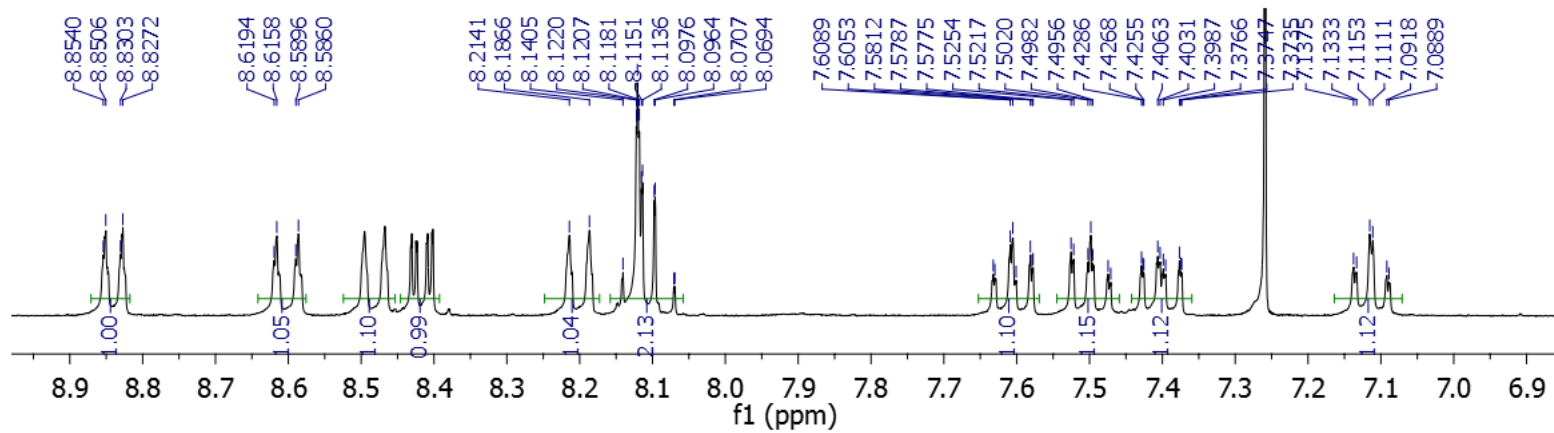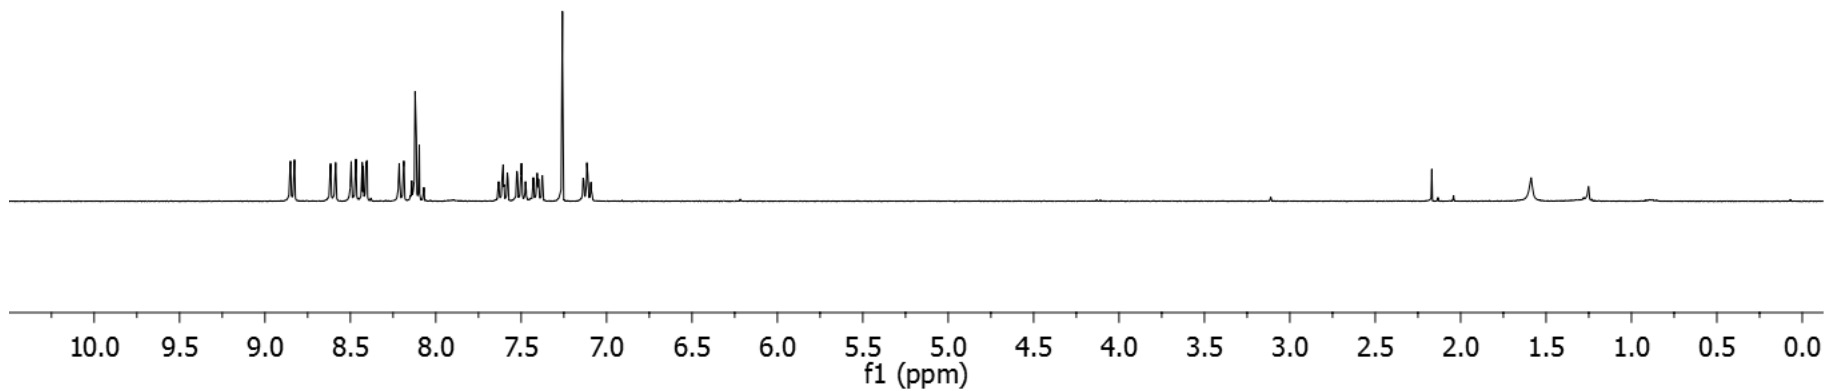

S2: NMR Spectra

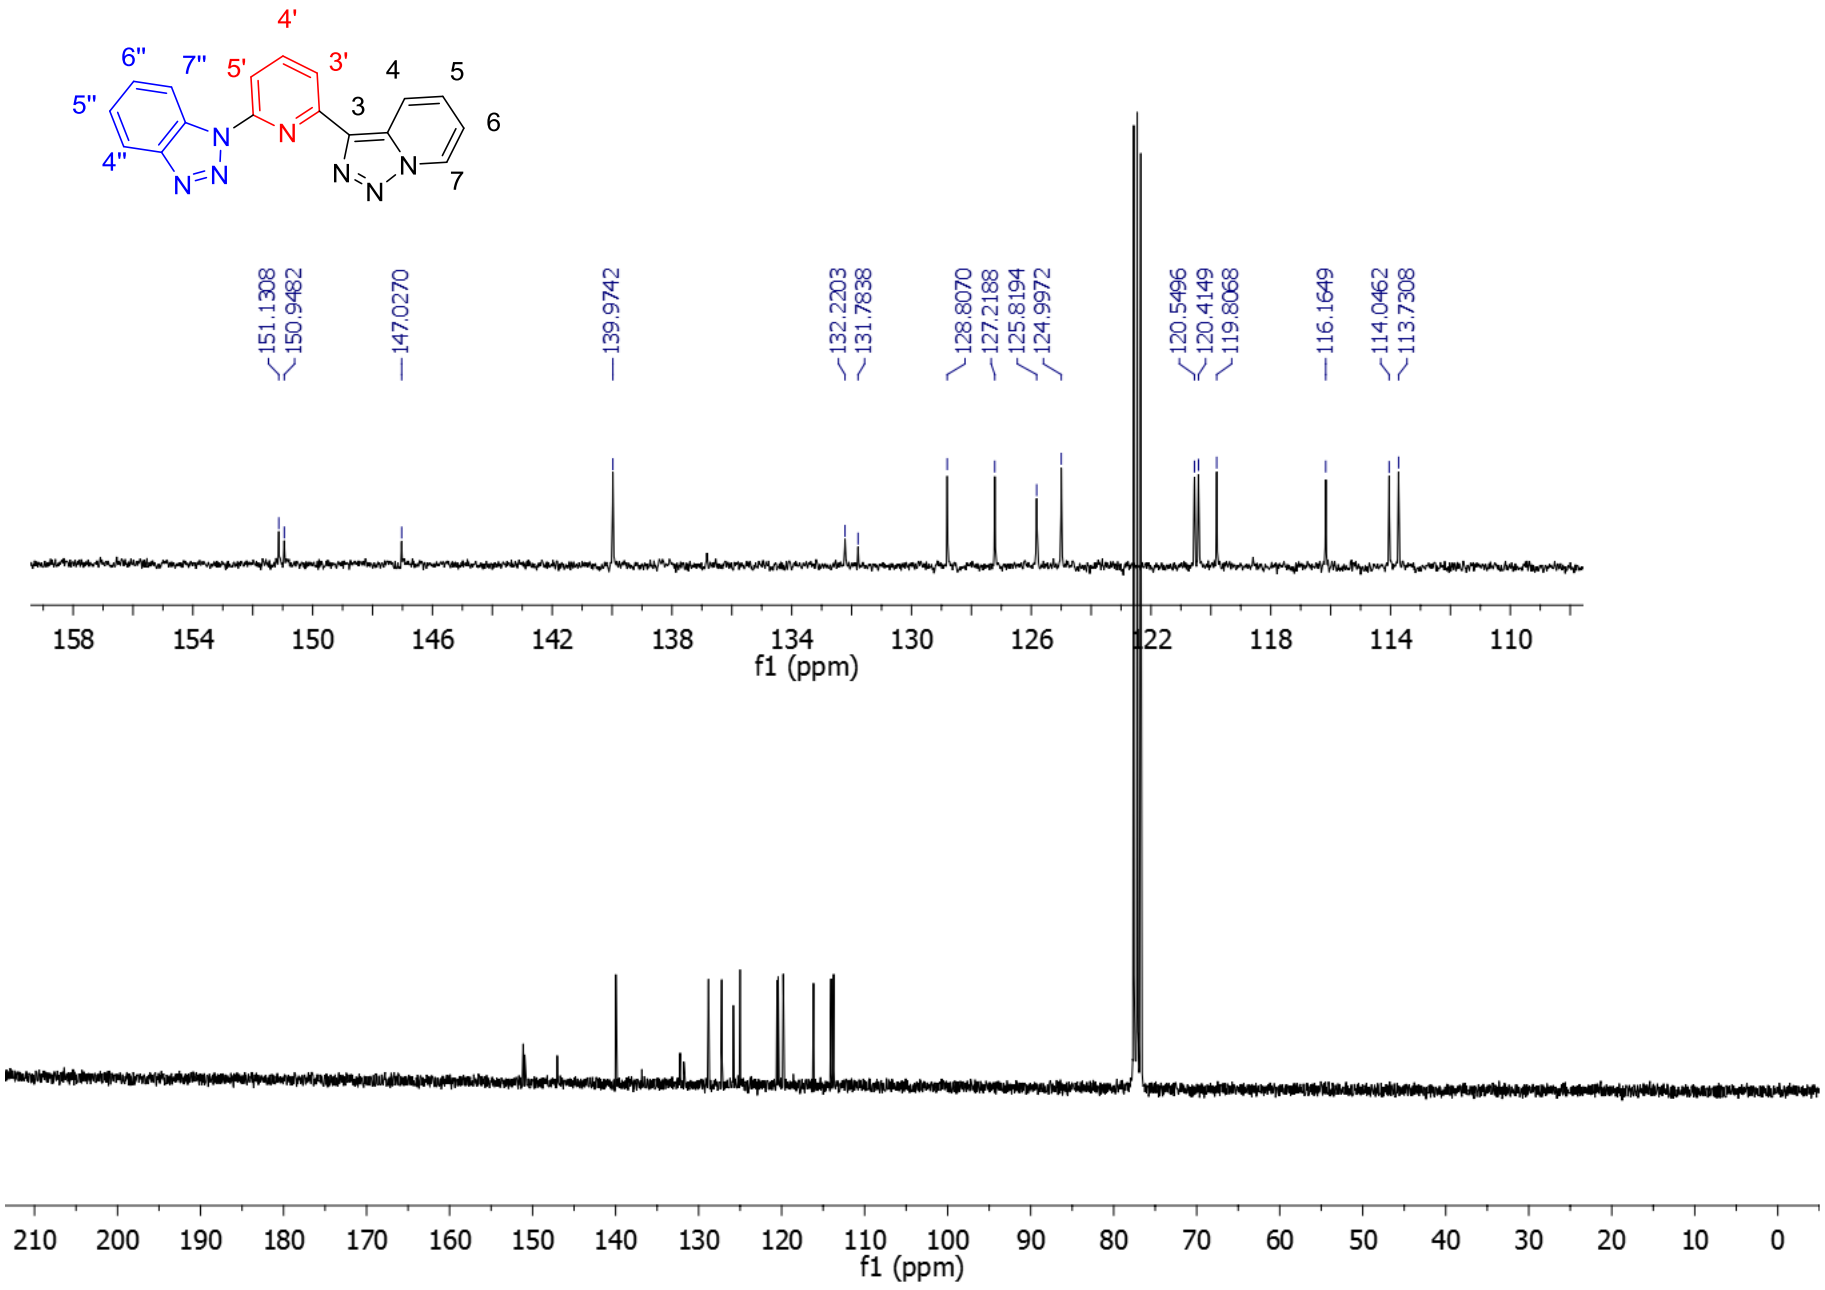

S2: NMR Spectra

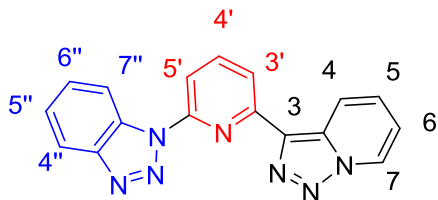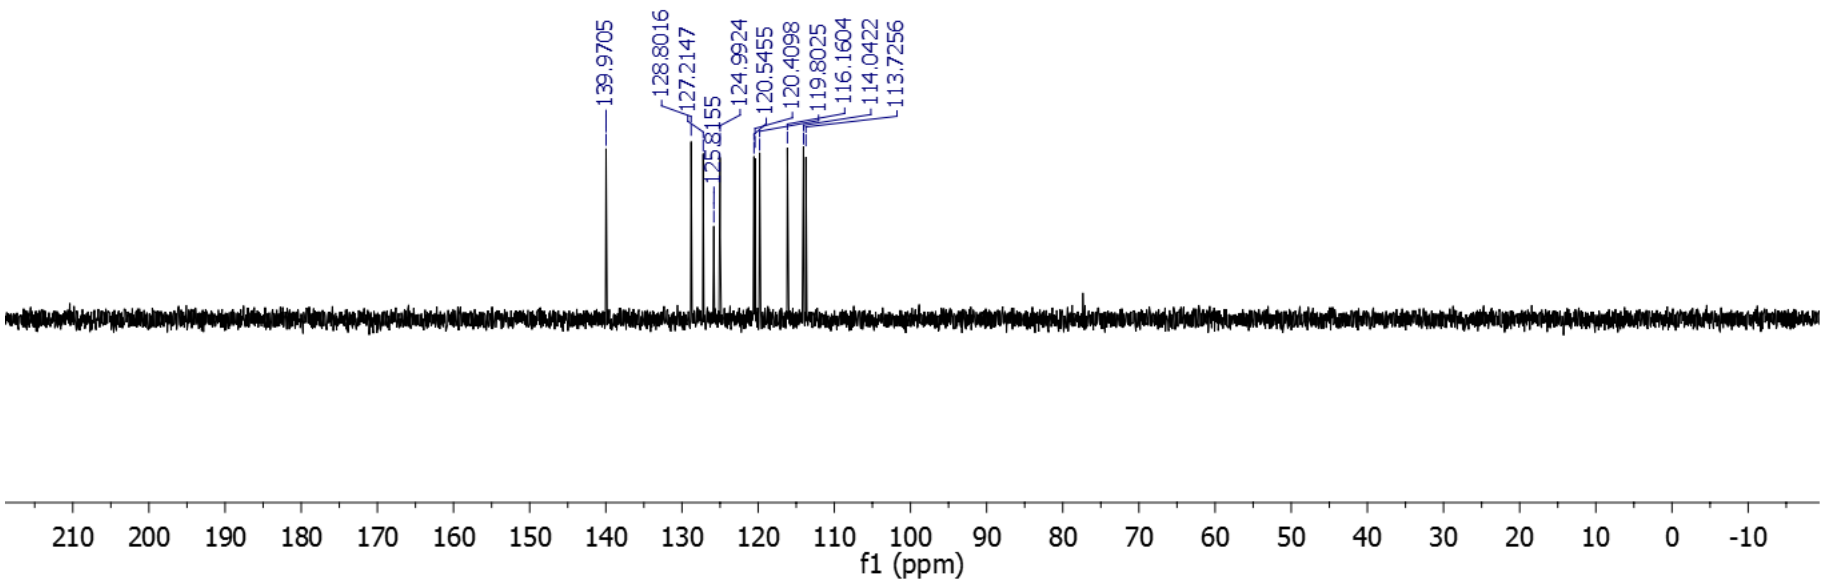

S2: NMR Spectra

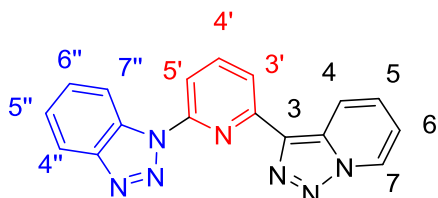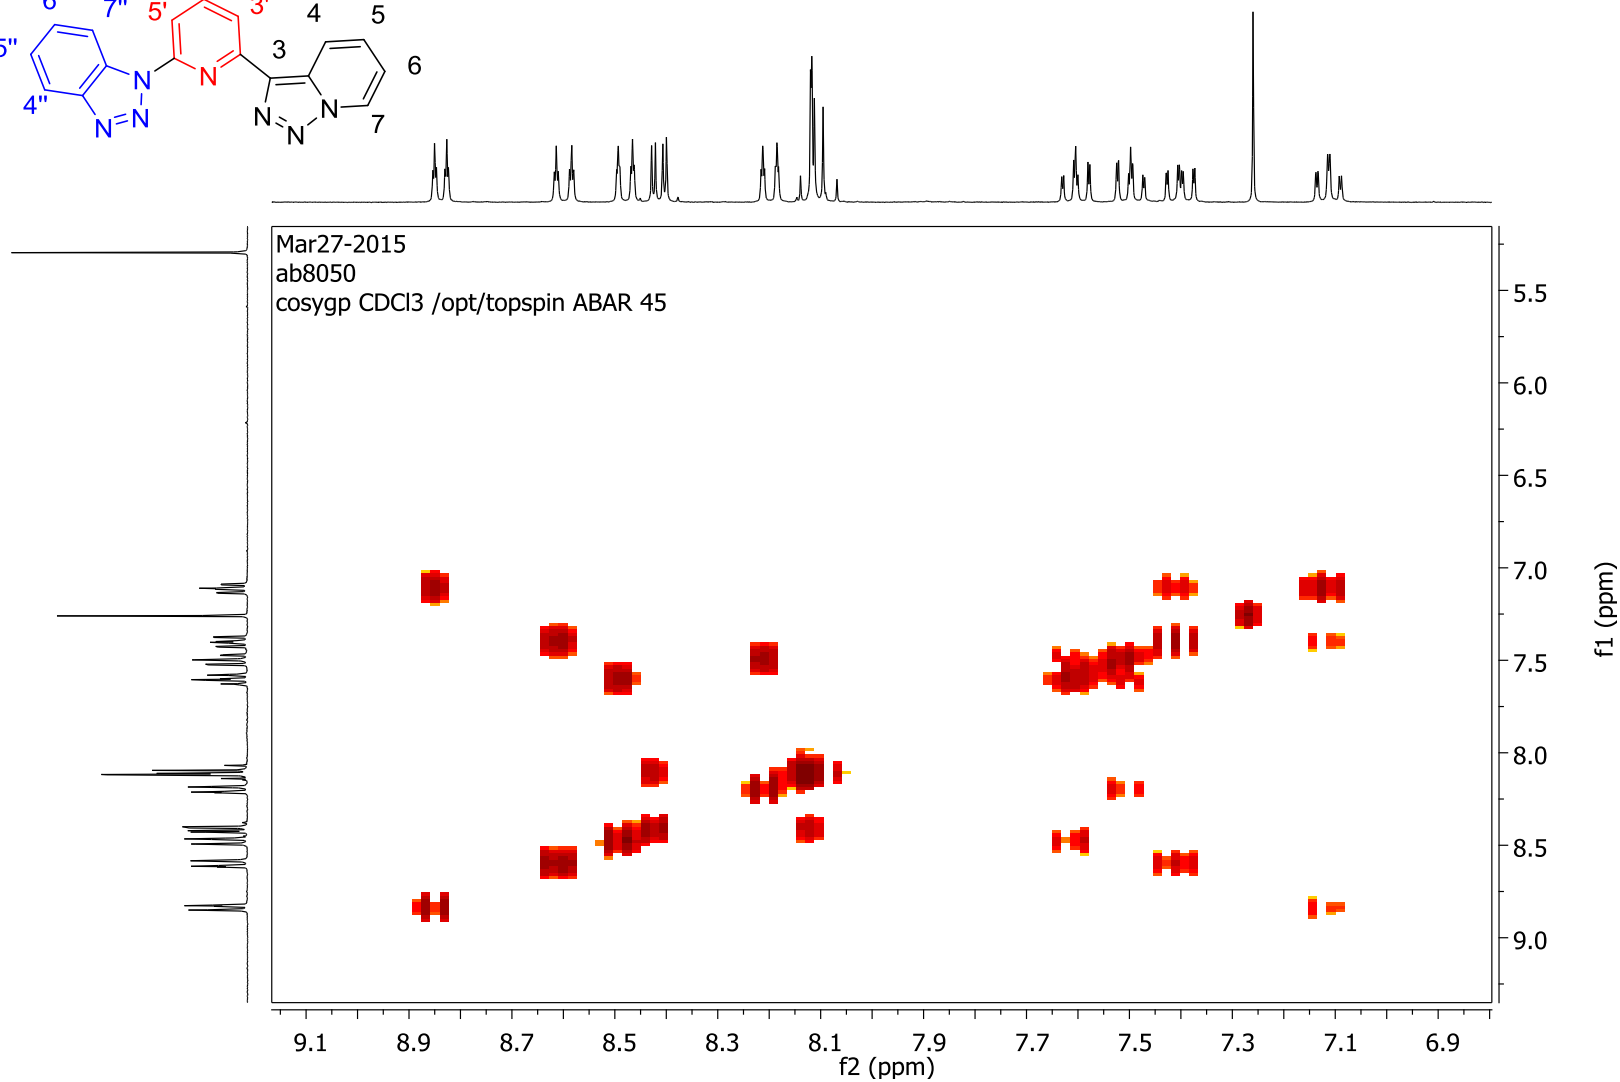

S2: NMR Spectra

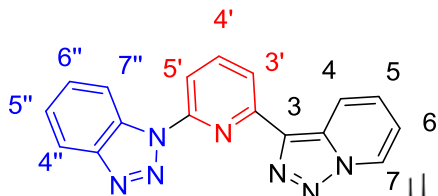

S2: NMR Spectra

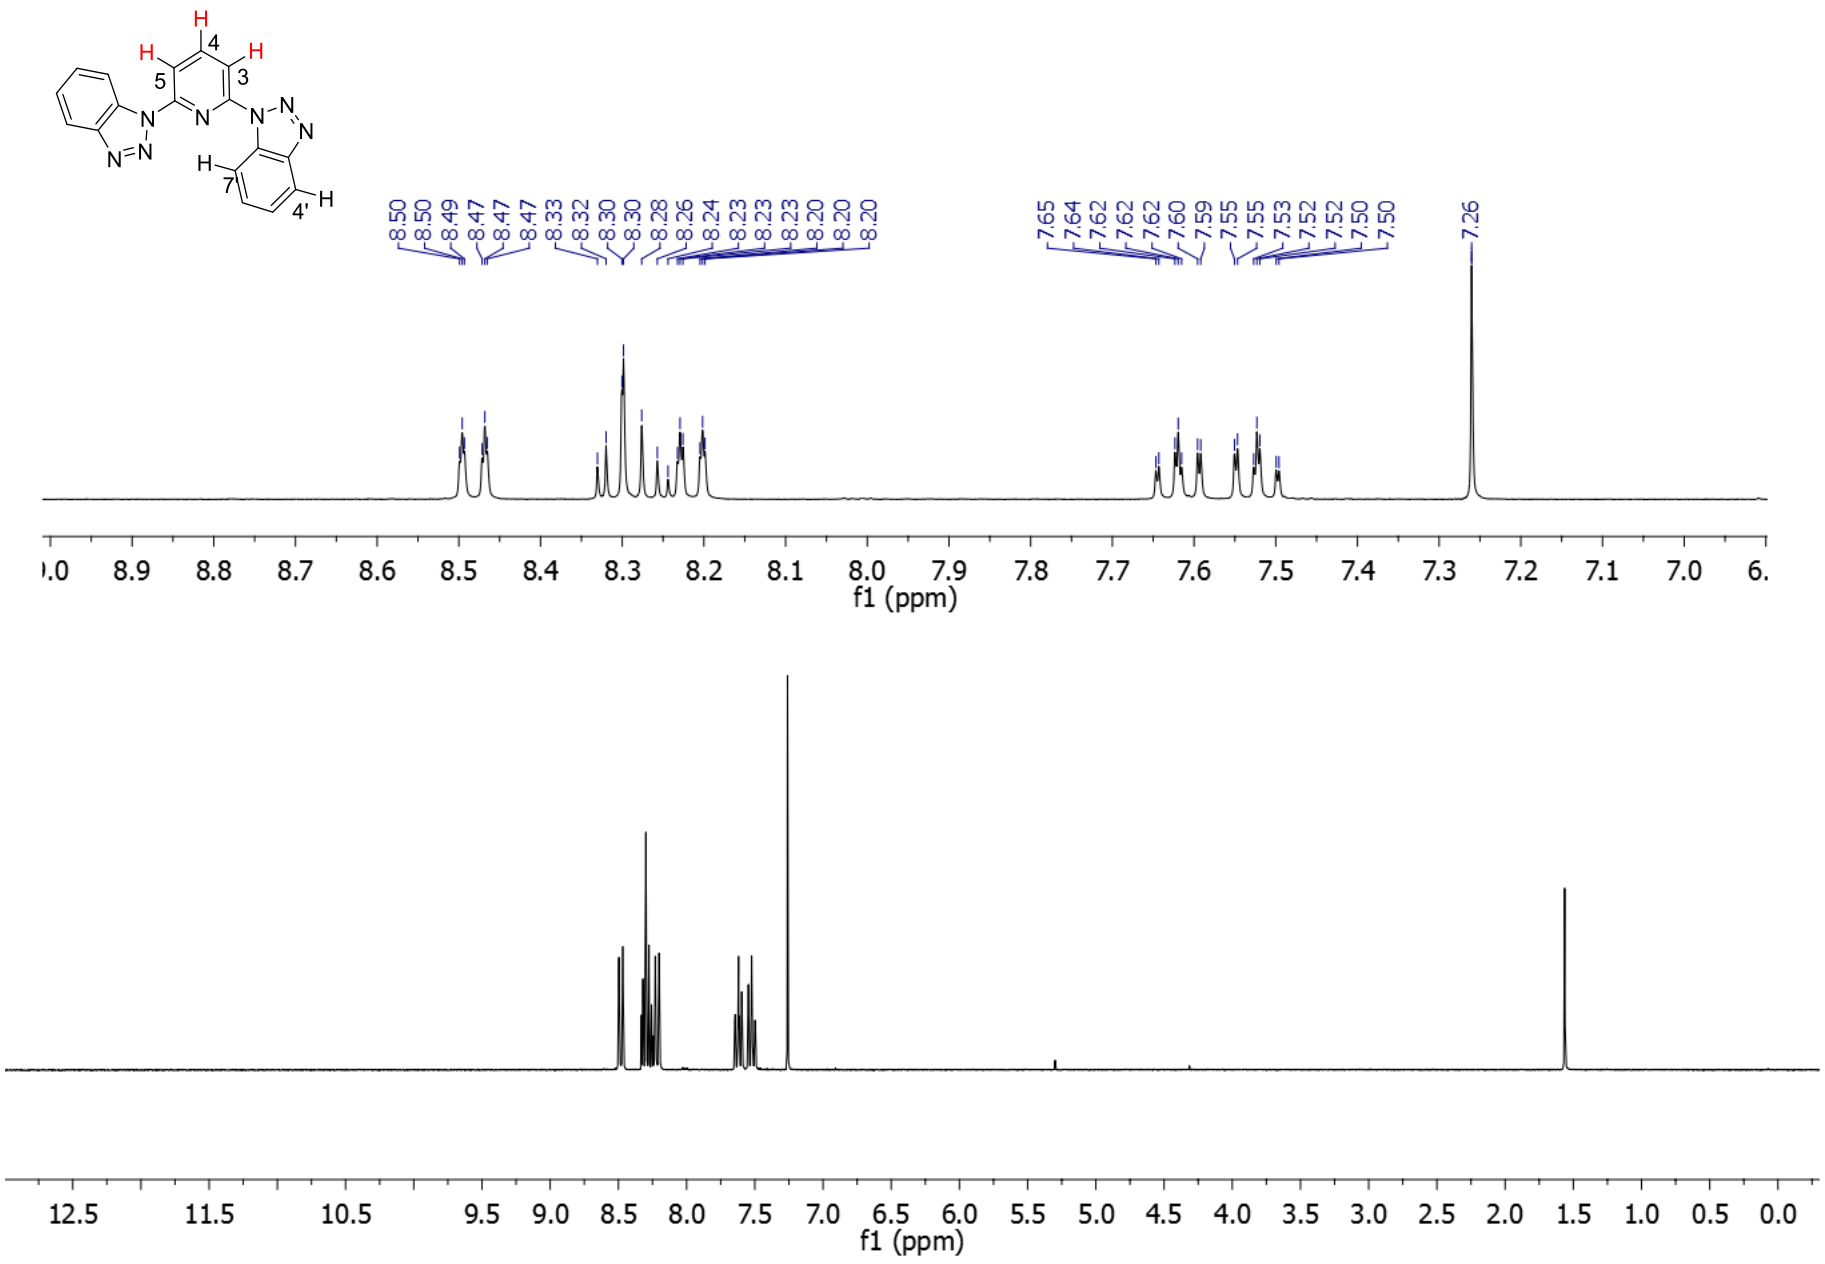



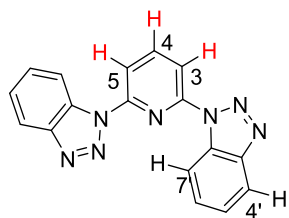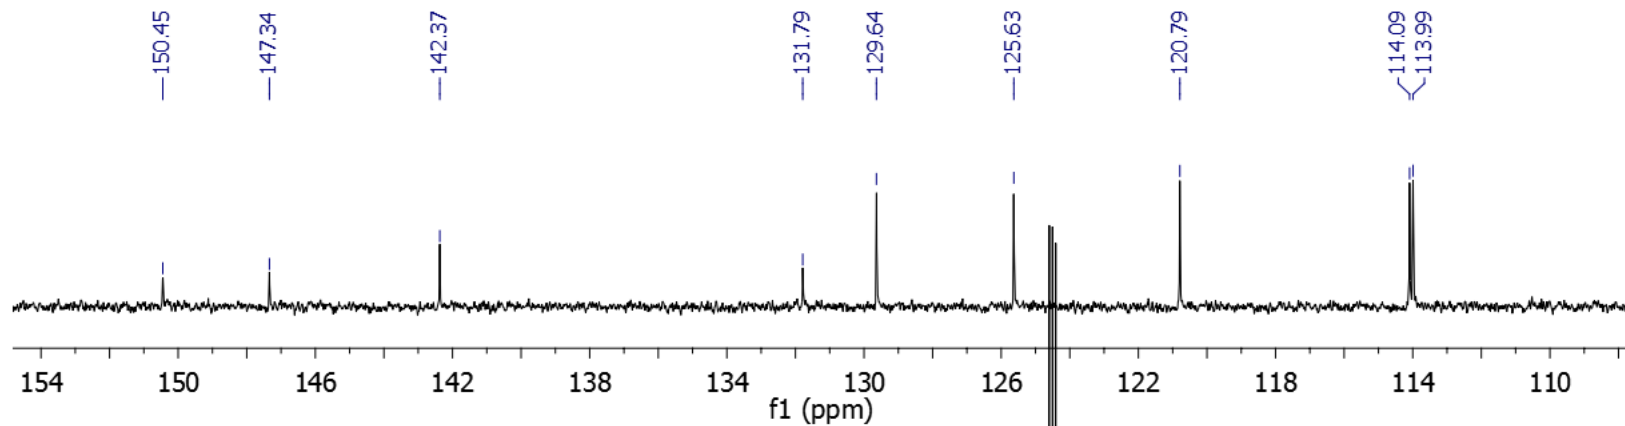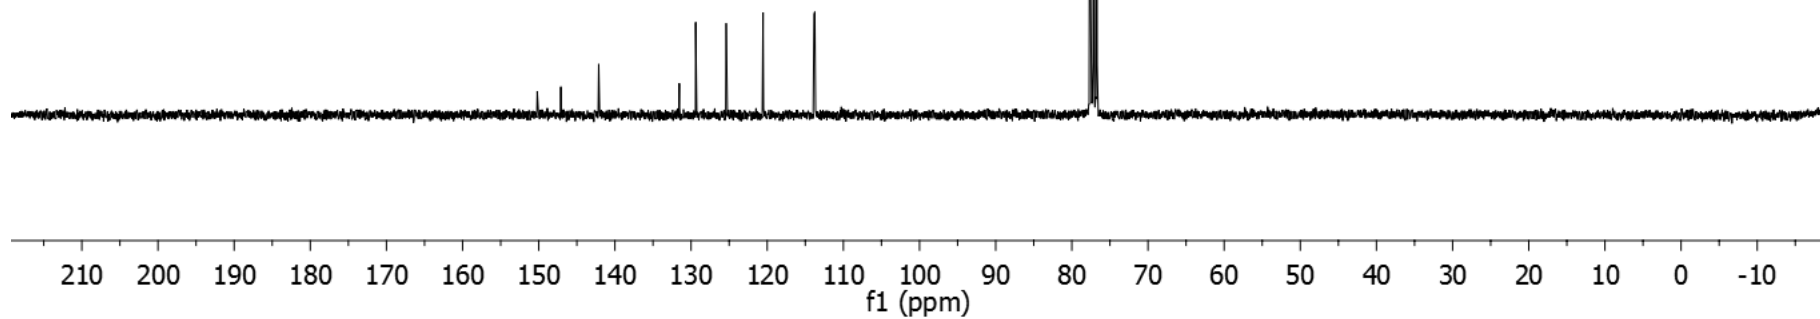

S2: NMR Spectra

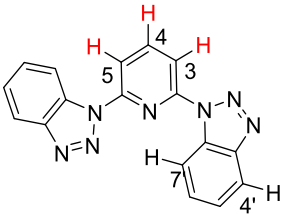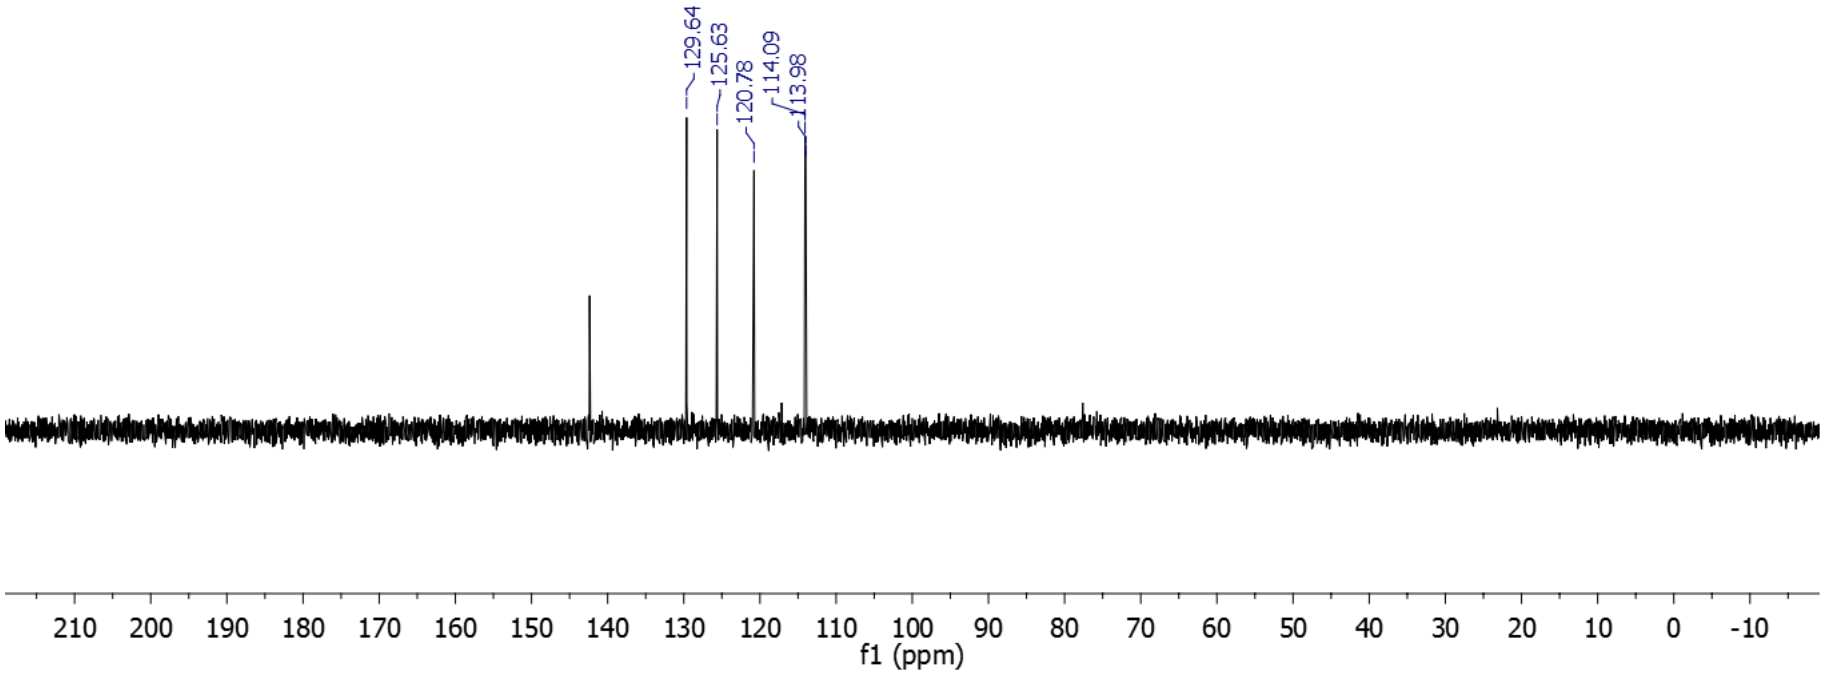

## S2: NMR Spectra

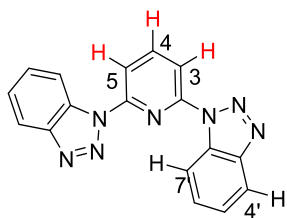

## AB<sub>2</sub> system

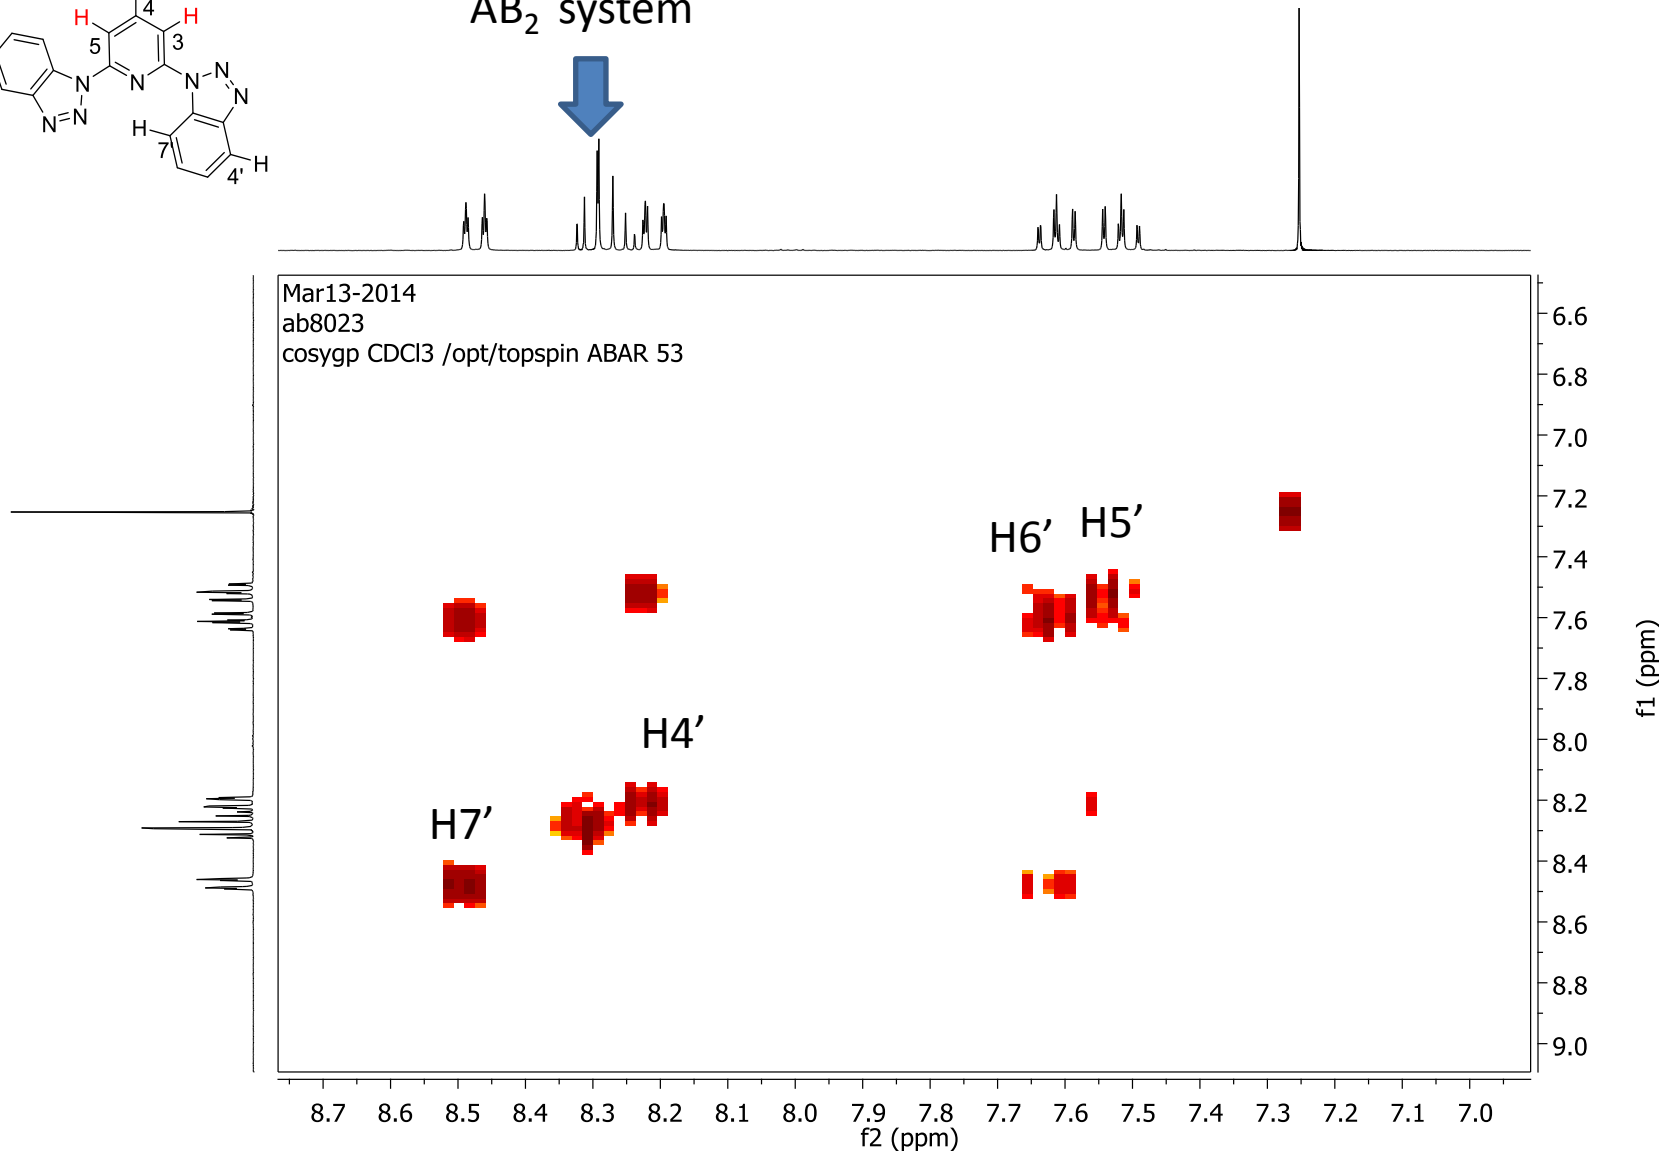

S2: NMR Spectra

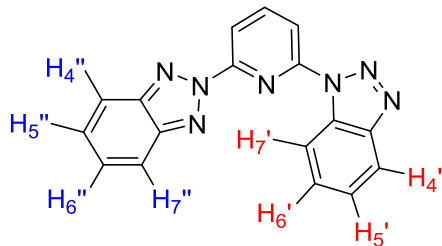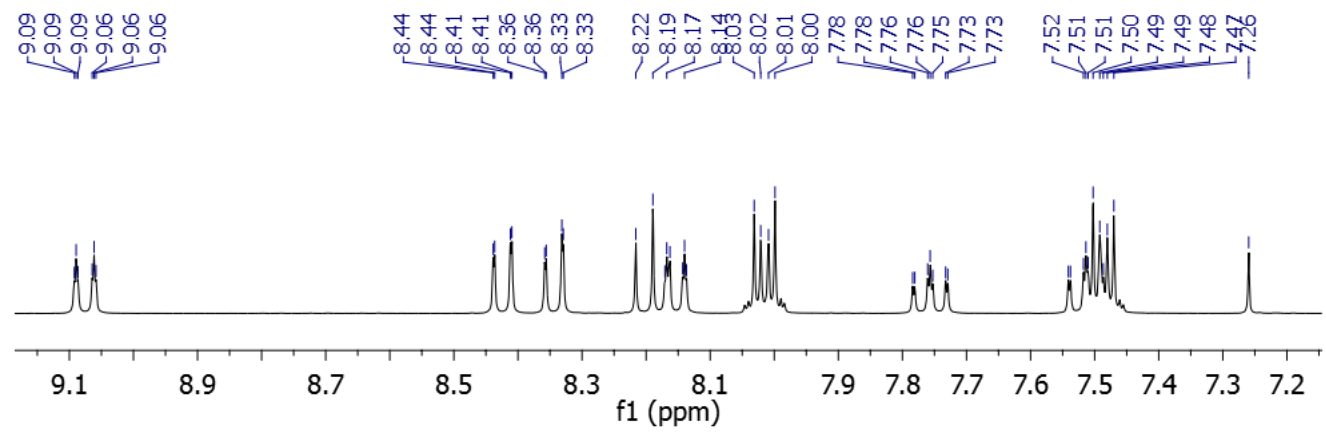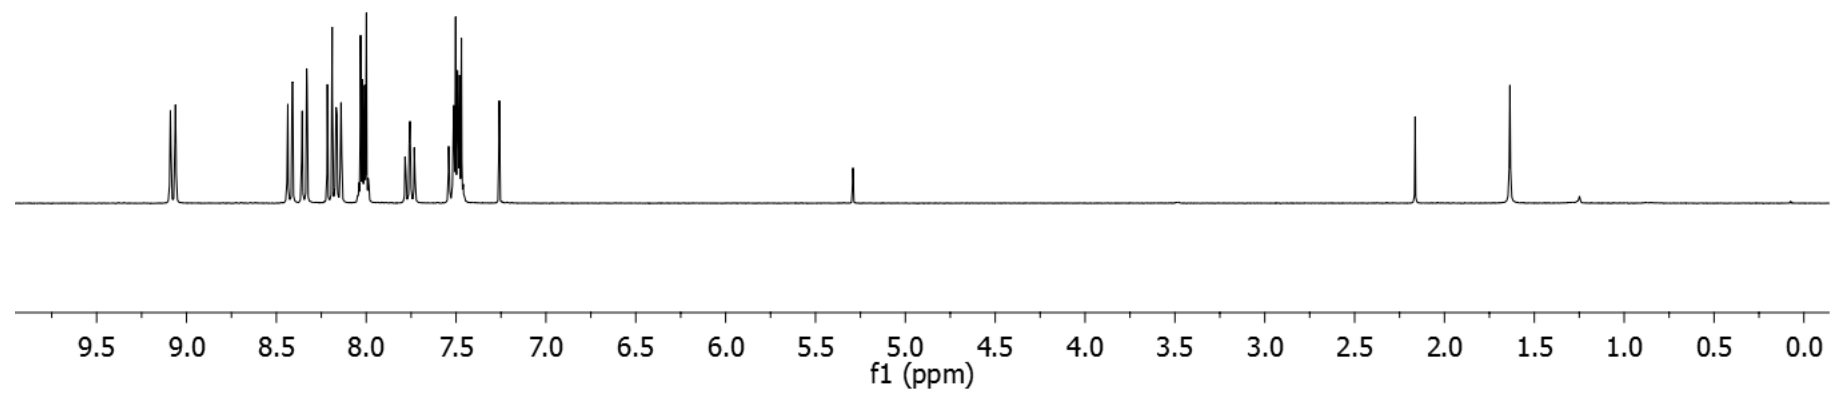

S2: NMR Spectra

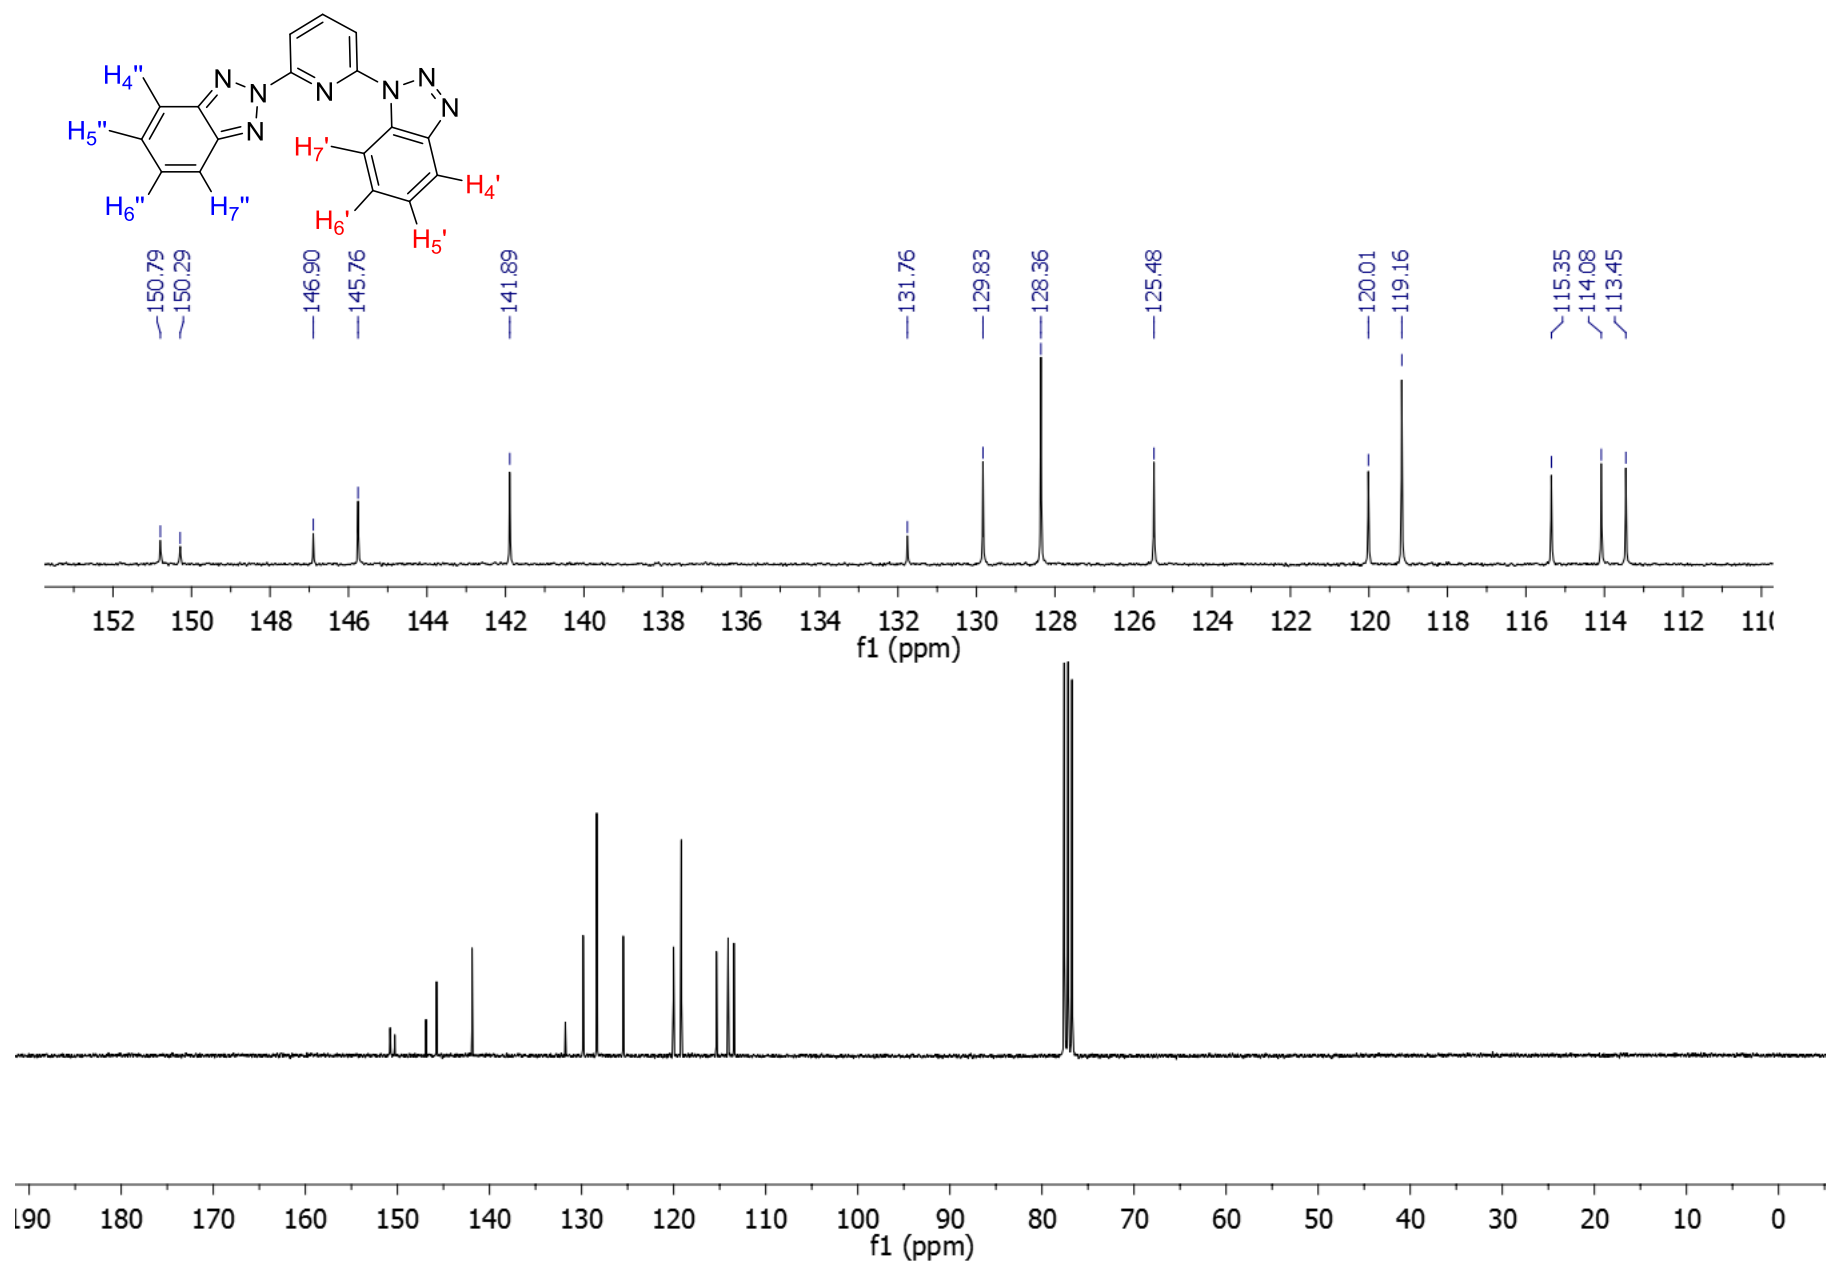

S2: NMR Spectra

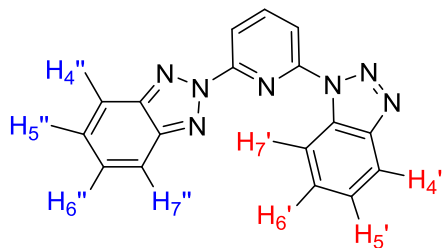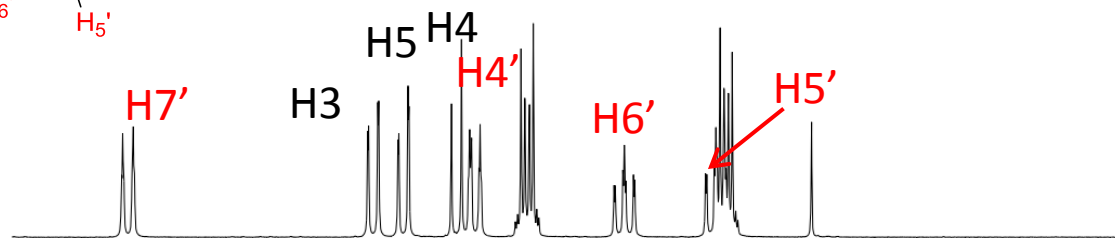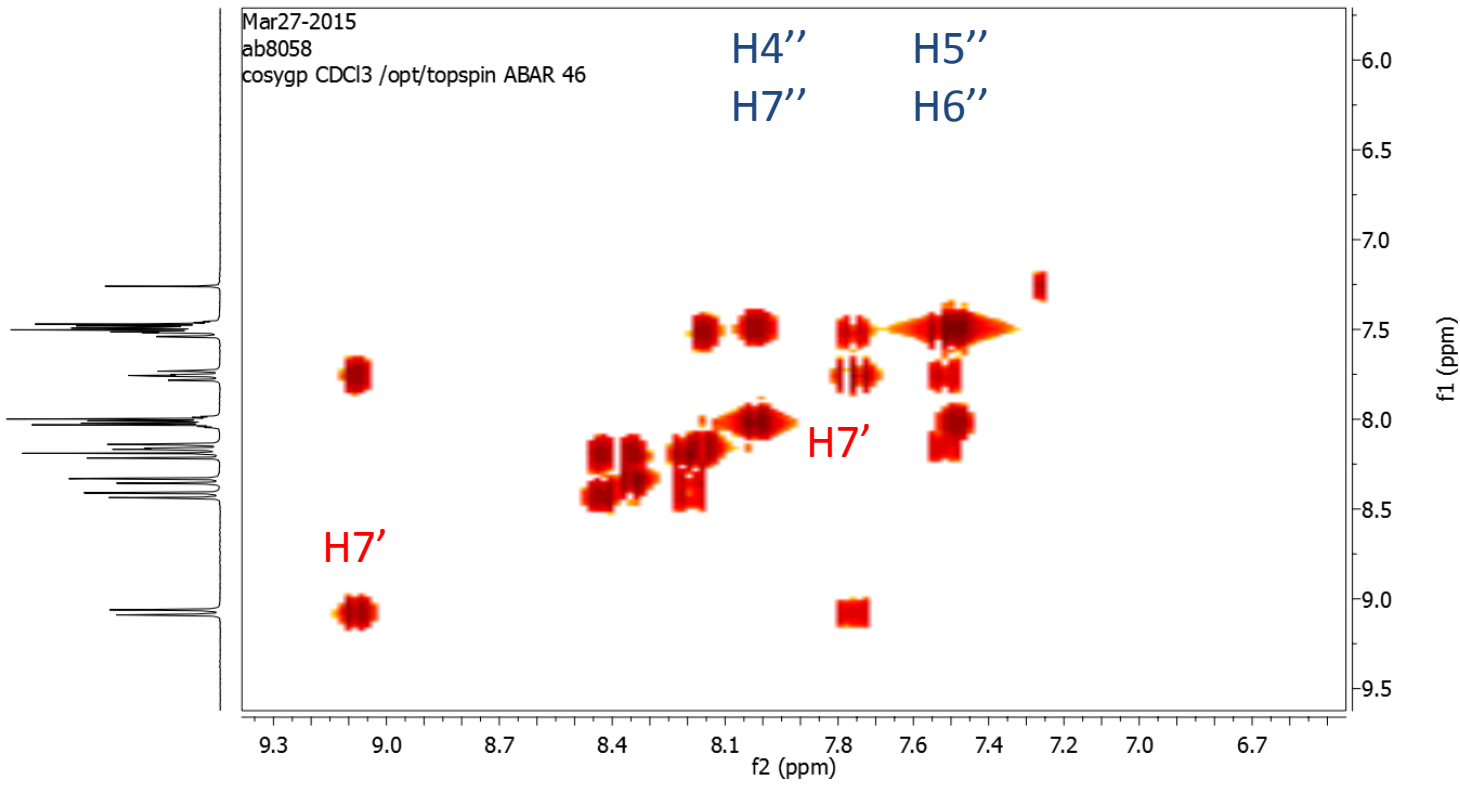

S2: NMR Spectra

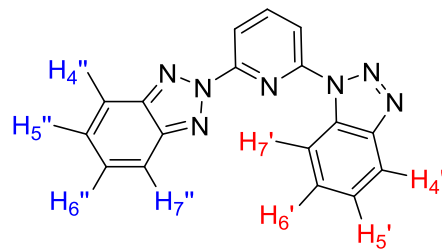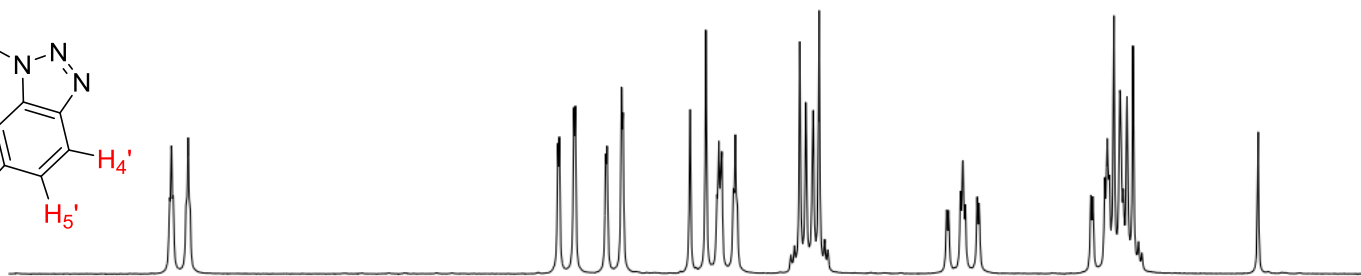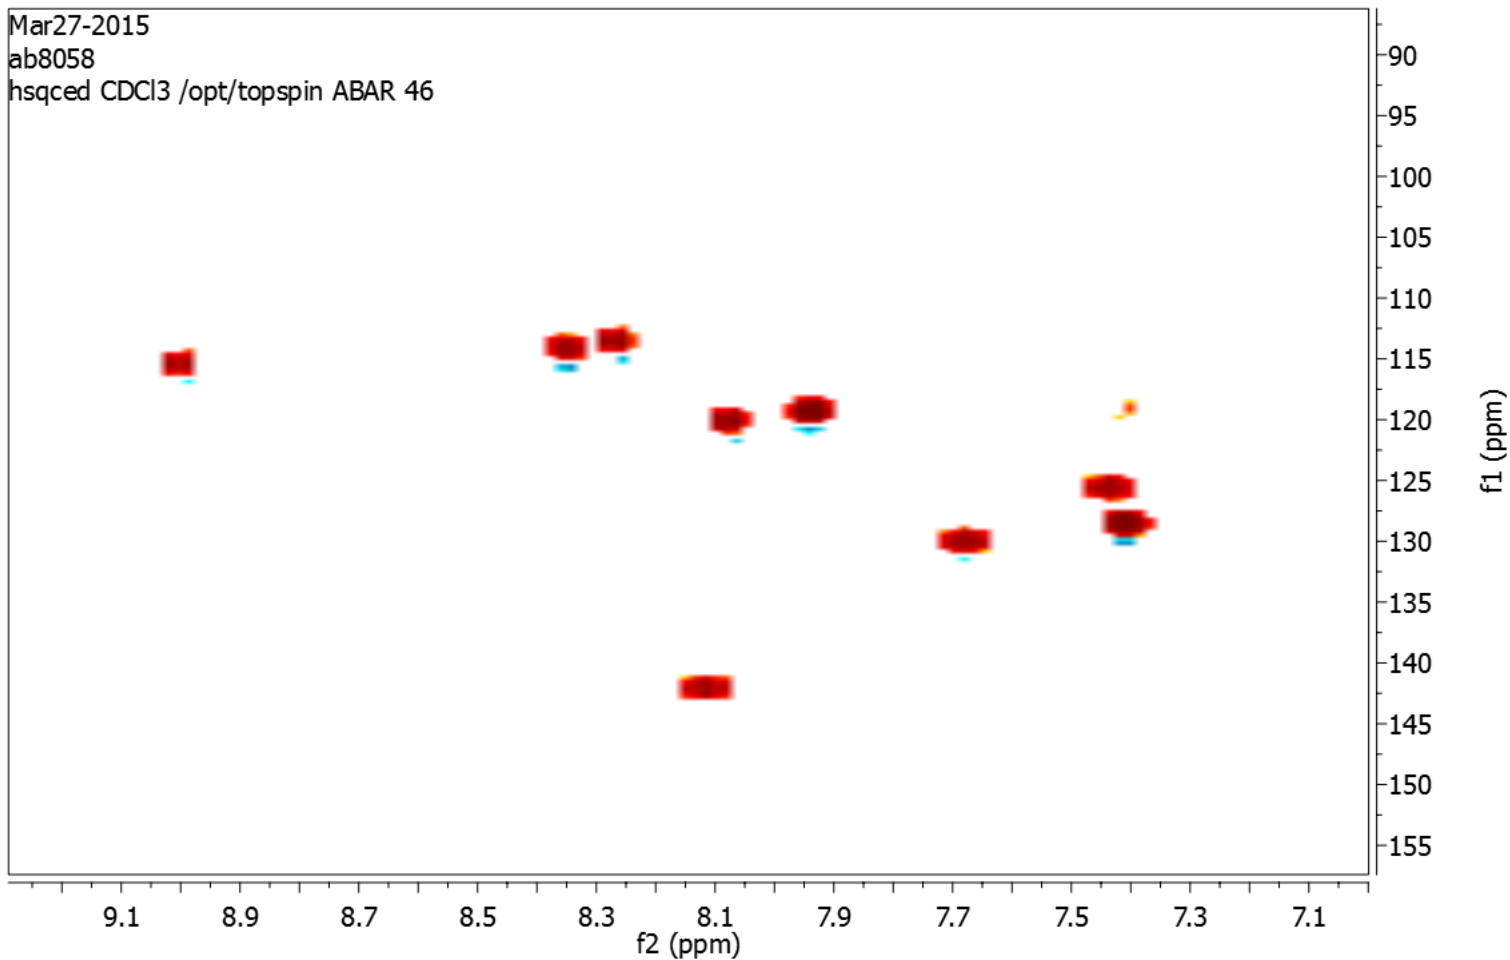

S3: Fluorescence Spectra

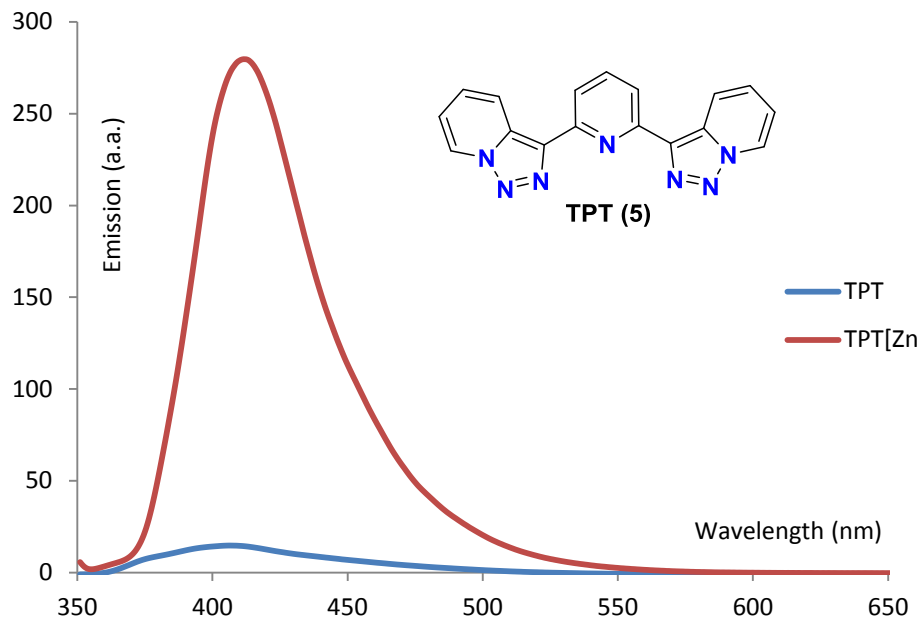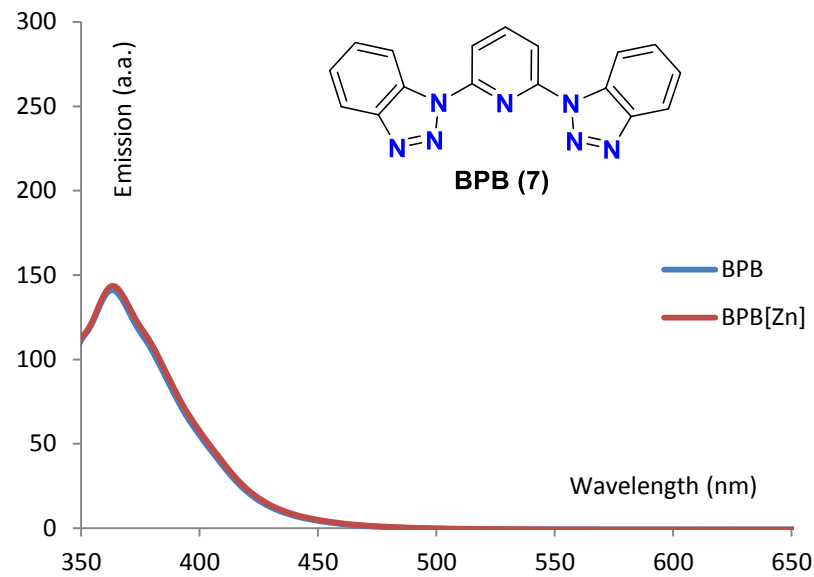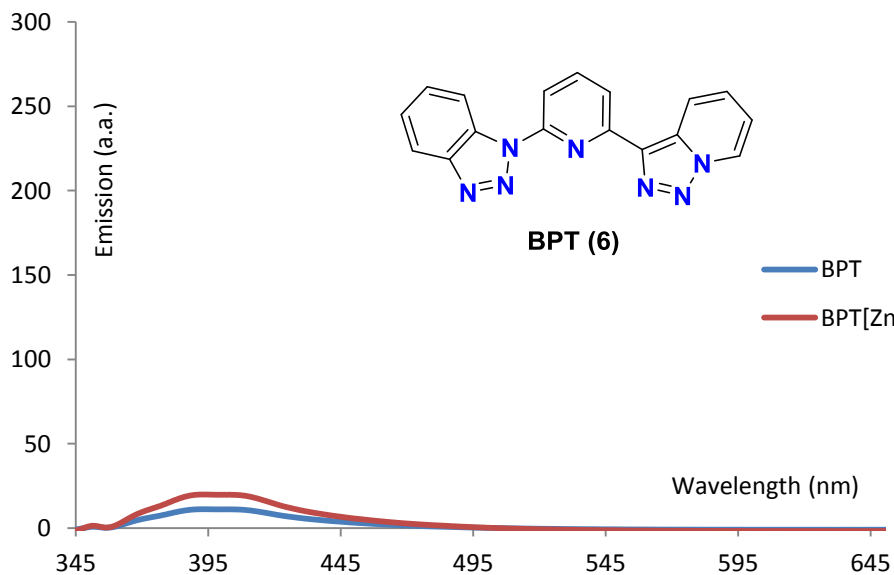



S4 Ortep for TPT and Ru(TPT)<sub>2</sub>

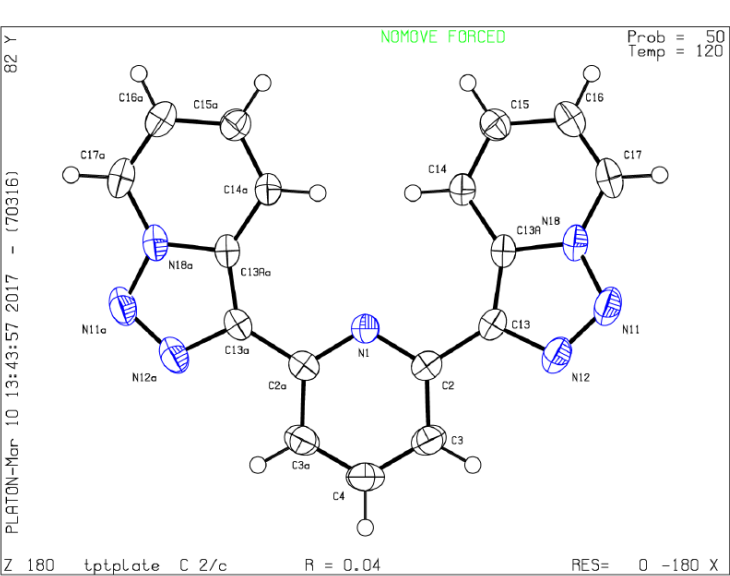

TPT CDCC-1537651

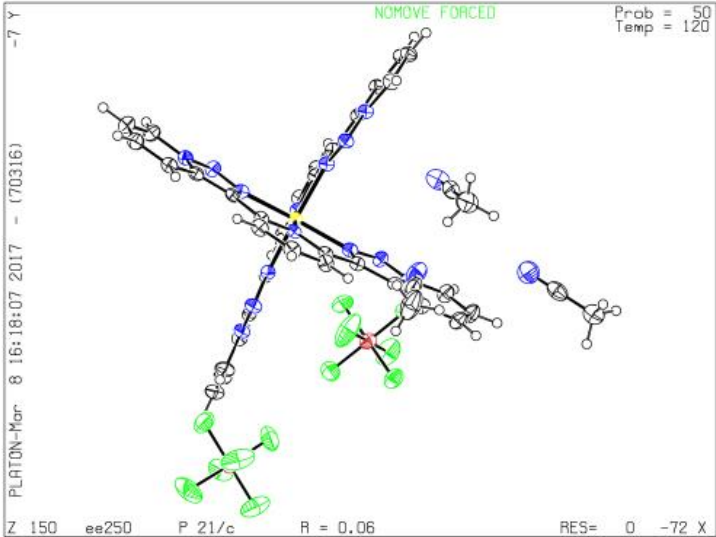

Ru(TPT)<sub>2</sub> CDCC-1537650

# S5: HRMS and NMR Spectra of Ru(TPT)<sub>2</sub>

Spectrum from AB3049.wiff (sample 1) - AB3049, +TOF MS (100 - 950) from 0.727 to 0.848 min

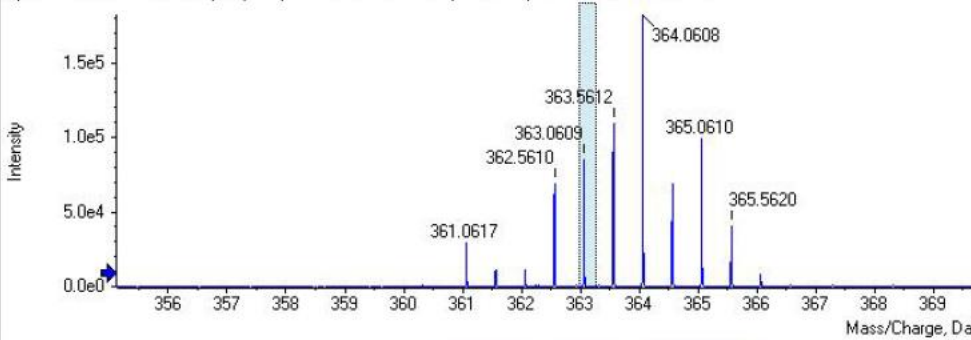

Emission (a.a.)

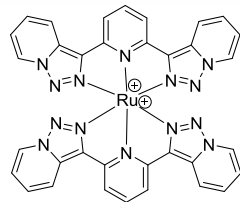

Chemical Formula: C<sub>35</sub>H<sub>25</sub>N<sub>14</sub>Ru<sup>2+</sup>  
Exact Mass: 743.1419  
m/z<sup>2</sup> [C<sub>35</sub>H<sub>25</sub>N<sub>14</sub>Ru]<sup>2+</sup> calc: 365.0670 found: 365.0610

Found elemental compositions

| Hit | Formula          | m/z      | RDB  | ppm  | MS Rank | MSMS ppm | M R |
|-----|------------------|----------|------|------|---------|----------|-----|
| 1   | RuC21H22N14F8    | 363.0607 | 13.0 | -0.1 | 1       |          |     |
| 2   | RuC14H27N12F12P  | 363.0608 | 1.0  | -0.3 | 2       |          |     |
| 3   | RuC23H25N8F11    | 363.0608 | 9.0  | -0.5 | 3       |          |     |
| 4   | RuC29H21N14F3    | 363.0607 | 24.0 | -0.6 | 4       |          |     |
| 5   | C32H22N2F12P2    | 363.0606 | 18.0 | 0.8  | 5       |          |     |
| 6   | RuC22H26N12F7P   | 363.0609 | 12.0 | -0.8 | 6       |          |     |
| 7   | RuC31H24N8F6     | 363.0609 | 20.0 | -1.0 | 7       |          |     |
| 8   | RuC15H31N10F11P2 | 363.0611 | 0.0  | -1.1 | 8       |          |     |
| 9   | C30H19N8F9P2     | 363.0605 | 22.0 | 1.1  | 9       |          |     |
| 10  | RuC24H29N6F10P   | 363.0610 | 8.0  | -1.3 | 10      |          |     |
| 11  | RuC30H25N12F2P   | 363.0610 | 23.0 | -1.3 | 11      |          |     |
| 12  | C28H16N14F6P2    | 363.0604 | 26.0 | 1.5  | 12      |          |     |
| 13  | RuC33H27N2F9     | 363.0610 | 16.0 | -1.5 | 13      |          |     |
| 14  | RuC23H30N10F6P2  | 363.0612 | 11.0 | -1.6 | 14      |          |     |
| 15  | C20H17N14F11P2   | 363.0603 | 15.0 | 1.7  | 15      |          |     |
| 16  | RuC32H28N6F5P    | 363.0611 | 19.0 | -1.8 | 16      |          |     |
| 17  | C29H15N10F10P    | 363.0602 | 23.0 | 1.8  | 17      |          |     |
| 18  | RuC25H33N4F9P2   | 363.0613 | 7.0  | -2.0 | 18      |          |     |
| 19  | RuC31H29N10FP2   | 363.0612 | 22.0 | -2.1 | 19      |          |     |
| 20  | RuC34H31F8P      | 363.0612 | 15.0 | -2.2 | 20      |          |     |
| 21  | RuC33H32N4F4P2   | 363.0614 | 18.0 | -2.5 | 21      |          |     |

MS Details MSMS Details Compound Details

| Isotope cluster details |                                     |          |             | Charge |
|-------------------------|-------------------------------------|----------|-------------|--------|
| Peak                    | Use                                 | m/z      | % Intensity | Width  |
| 0                       | <input checked="" type="checkbox"/> | 363.0609 | 100.0       | 0.011  |

Elements from

Elements to

Mass tolerance (ppm)

Intensity tolerance (%)

#C/#heteroatoms greater than

MS result summary for RuC21H24N14F8, [M+2H]<sup>++</sup>

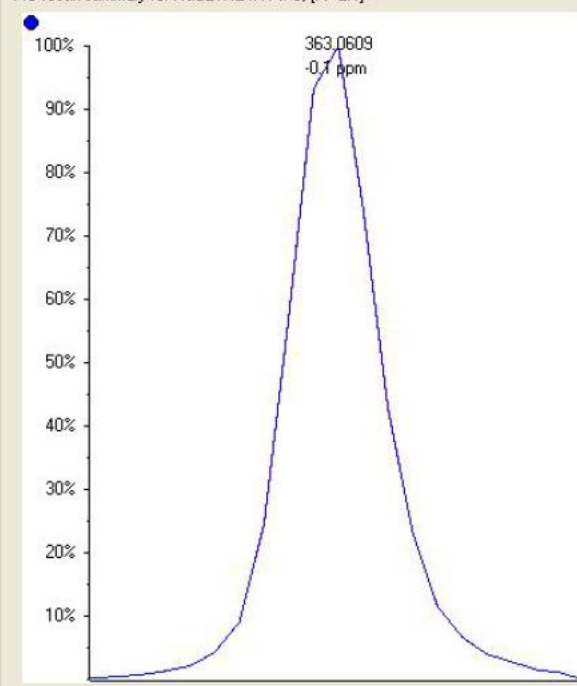

Ion type: [M+2H]<sup>++</sup> 2 additional ions...

S5: HRMS and NMR Spectra of Ru(TPT)<sub>2</sub>

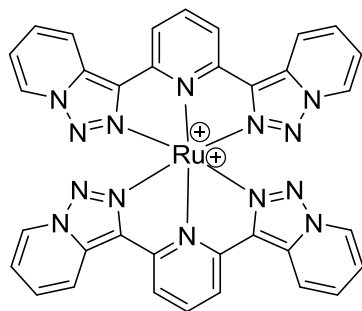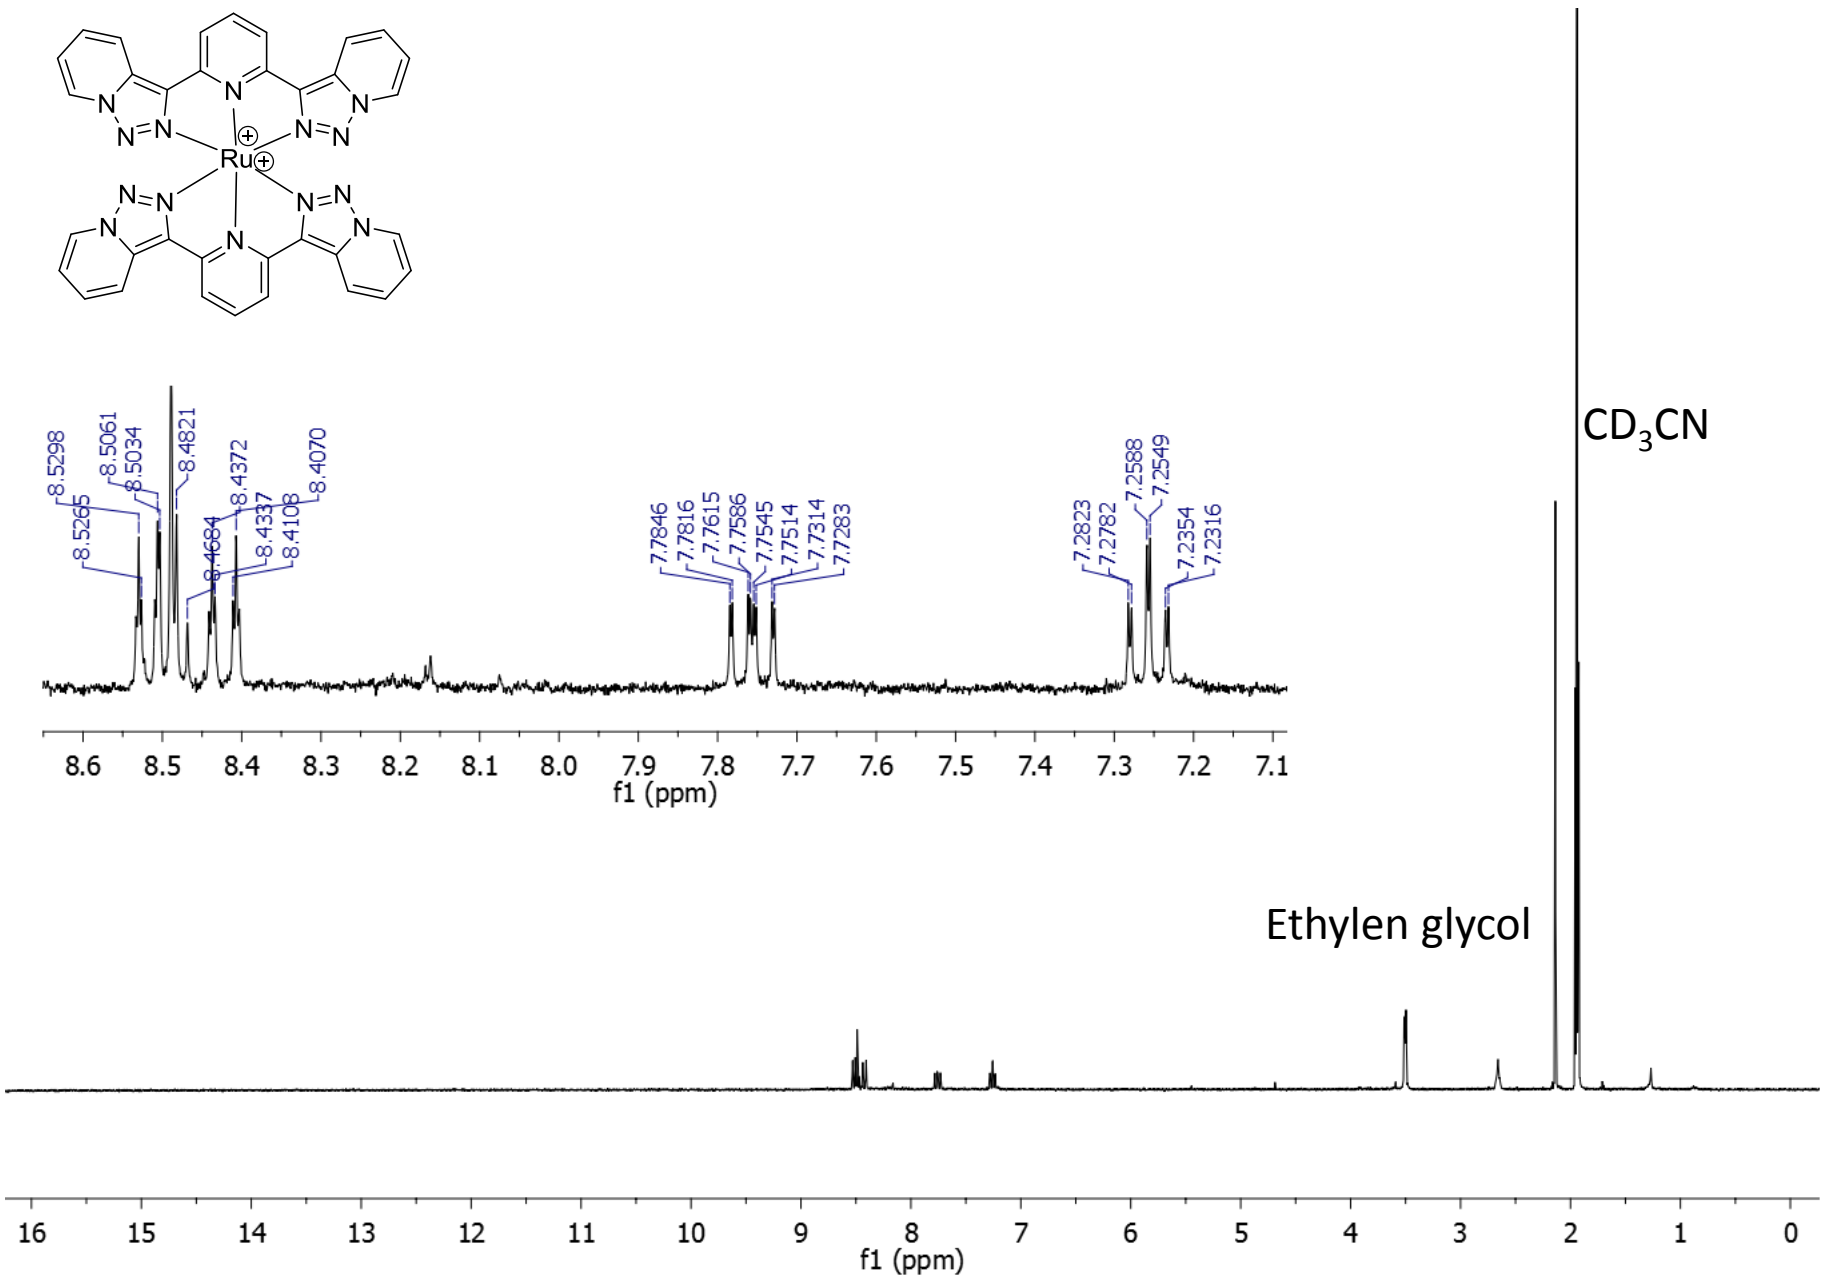

S5: HRMS and NMR Spectra of Ru(TPT)<sub>2</sub>

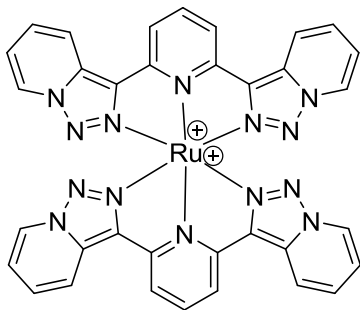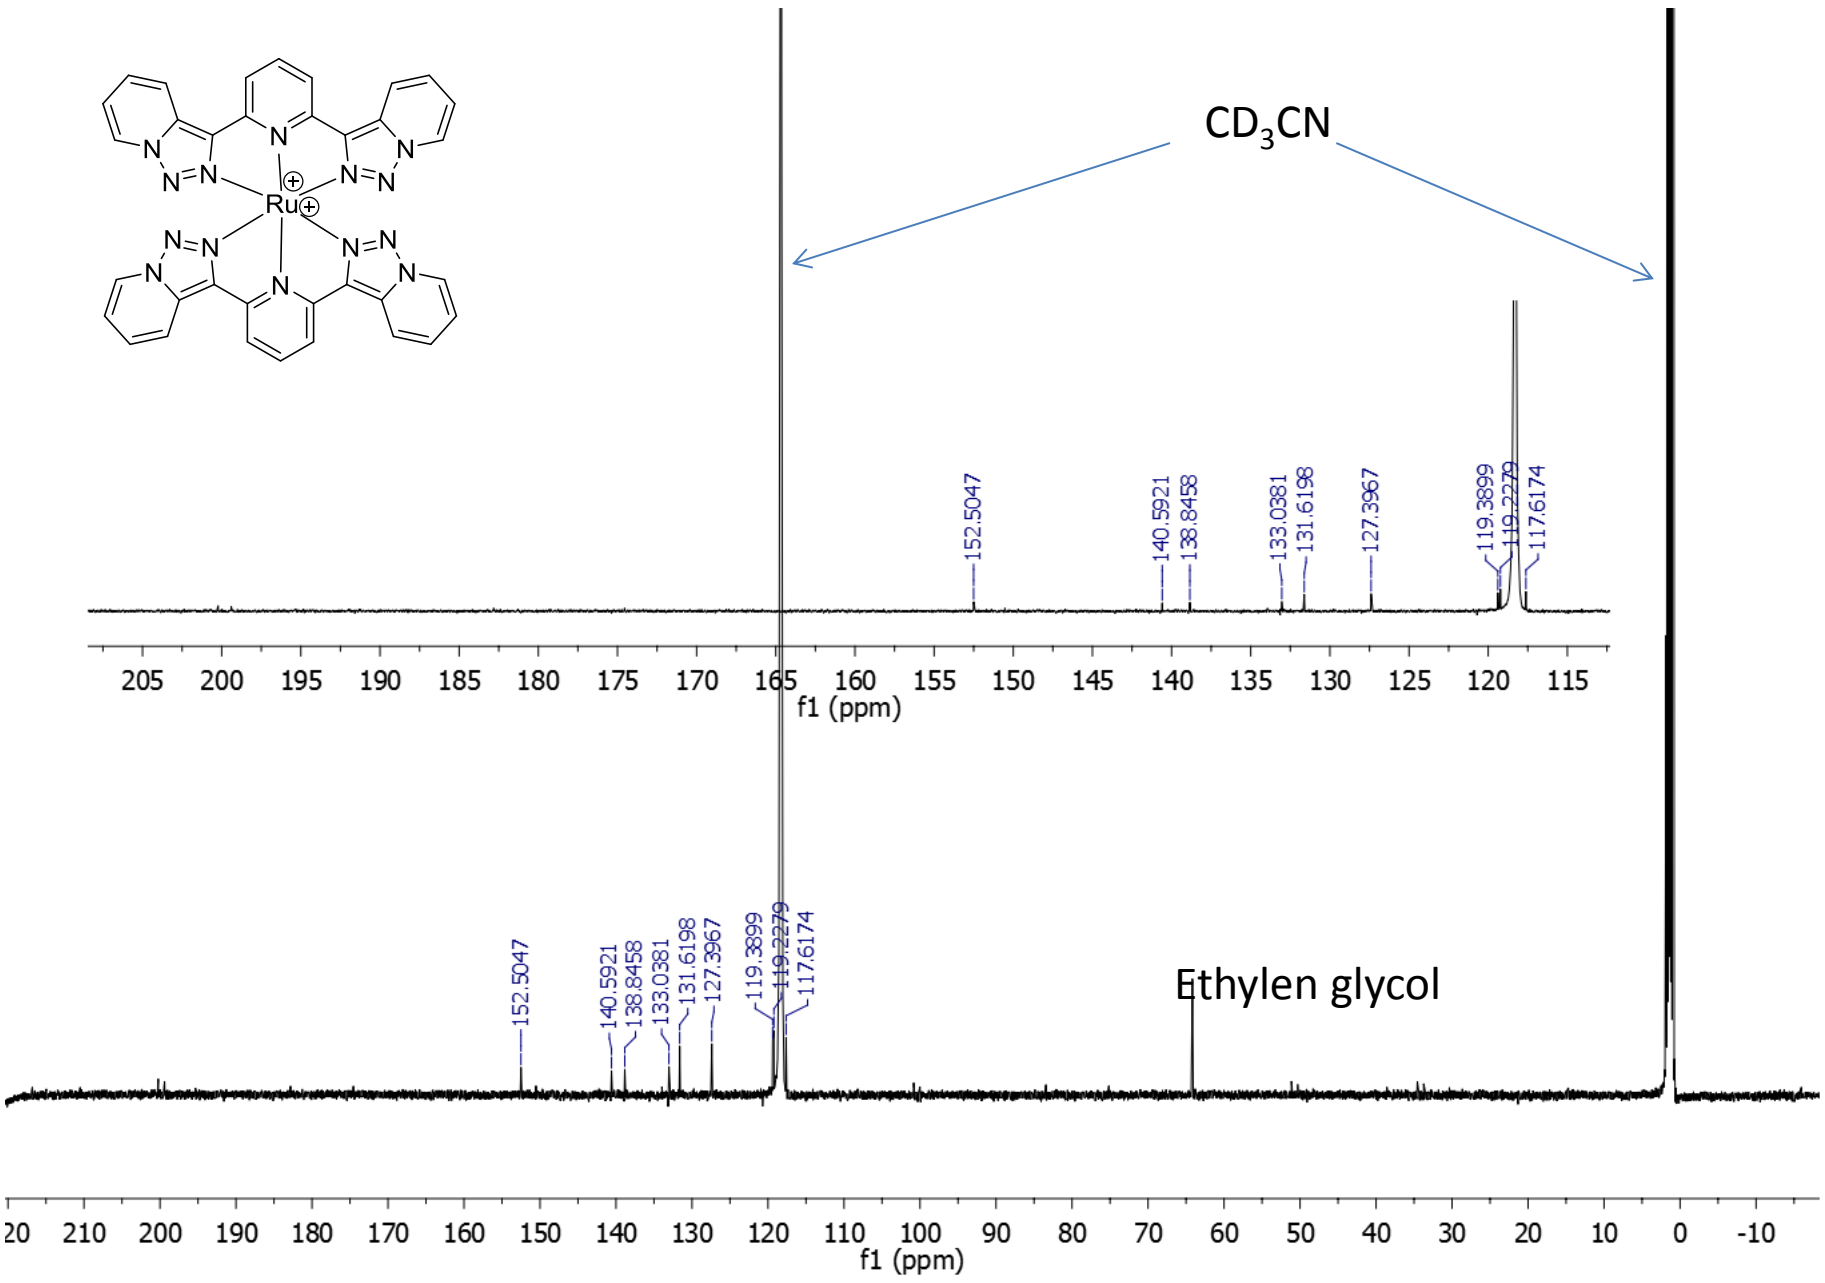

Supplement: c7nj00962c1.pdf [file c7nj00962c1.pdf]
